# Supplementary material for: Persistence of Antibody Responses to the SARS-CoV-2 in Dialysis Patients and Renal Transplant Recipients Recovered from COVID-19
Source: MDPI journal article supplement (doi:10.3390/pathogens10101289), 2021-10-06
Supplement: s1 [file s1]

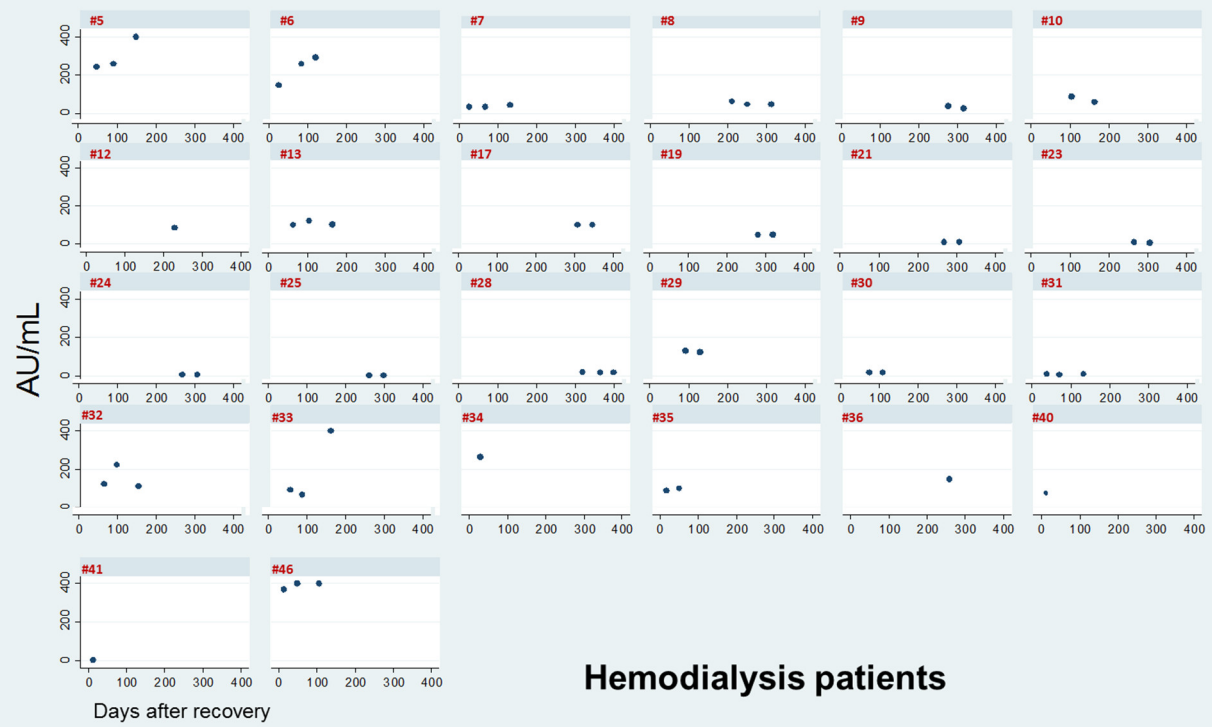

**Figure 1S.** Single course of quantitative antibody titers over time starting from day 0 (time of clinical and laboratory recovery) to the last observation available in each of the 26 hemodialysis patients.

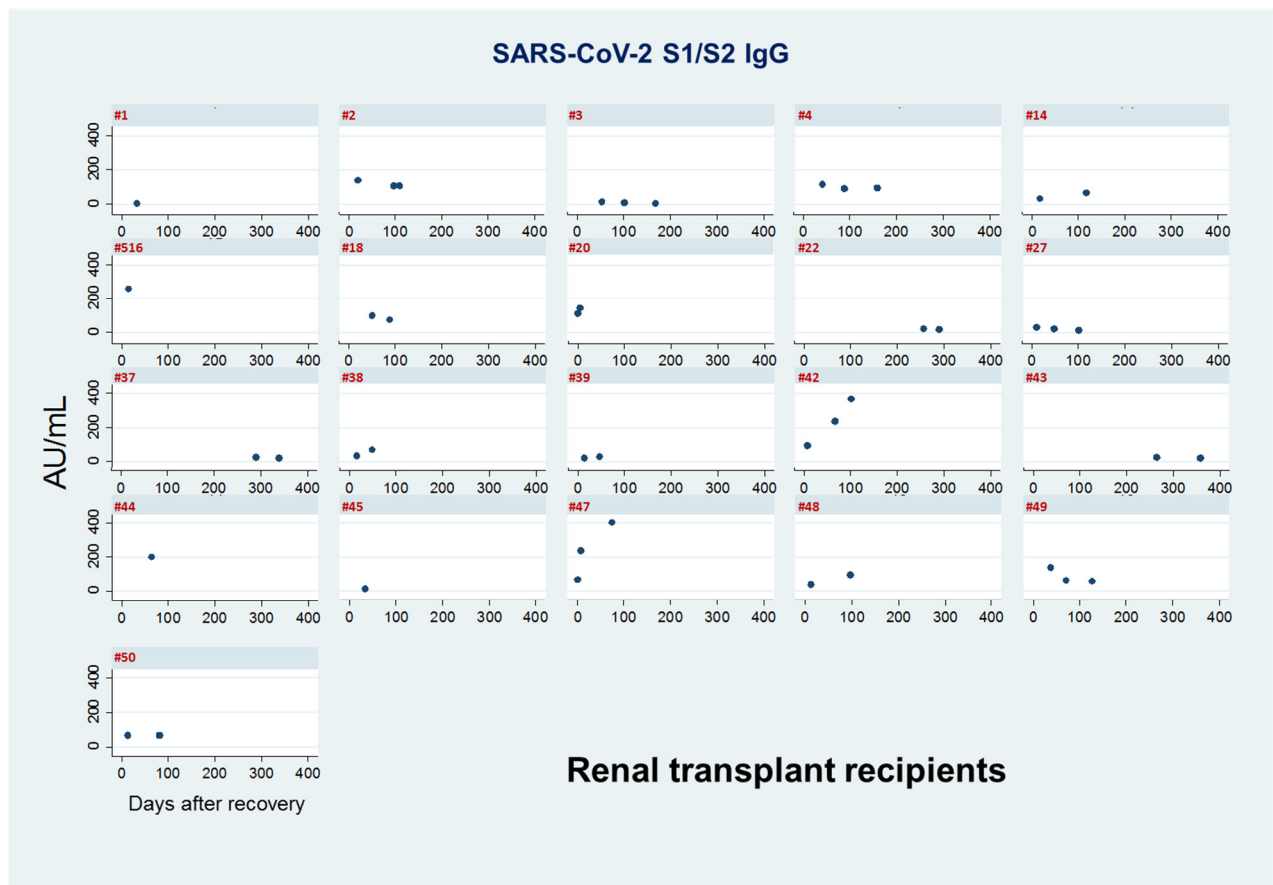

**Figure 2S.** Single course of quantitative antibody titers over time starting from day 0 (time of clinical and laboratory recovery) to the last observation available in each of the 21 renal transplant recipients.
